# Supplementary material for: Effect of LDHA Inhibition on TNF-α-Induced Cell Migration in Esophageal Cancers
Source: MDPI journal article supplement (doi:10.3390/ijms232416062), 2022-12-16
Supplement: s1 [file s1]

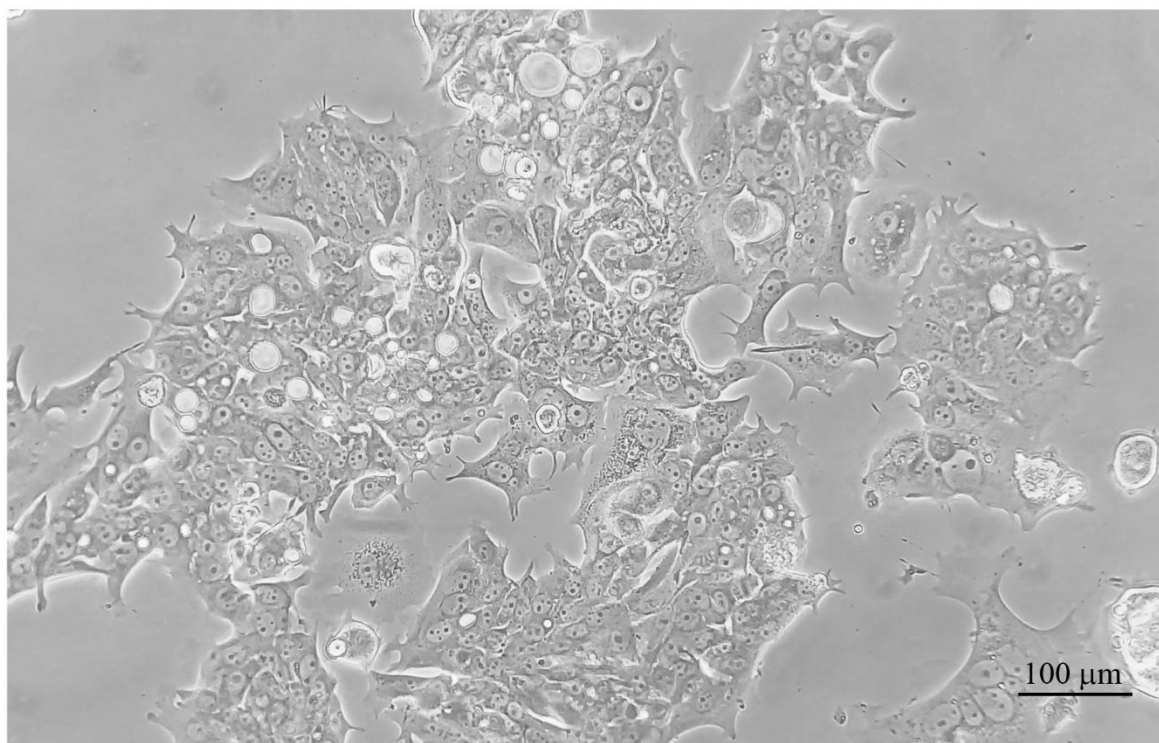

| % Match | ATCC cat no | Designation | D5S818 | D13S317 | D7S820 | D16S539 | vWA   | TH01 | AMEL | TPOX | CSF1PO | Origin         |
|---------|-------------|-------------|--------|---------|--------|---------|-------|------|------|------|--------|----------------|
| 100     | STRB3221    | ESCC-7      | 12     | 12,15   | 10,11  | 11,12   | 14,16 | 9,10 | X,Y  | 8    | 10,11  | European, East |

Figure S1. Morphology and DNA fingerprinting of EC7 cells. A light micrograph of the newly established EC7 esophageal cancer cell line and their STR profile obtained by STR analysis according to the ATCC world standard (2020).
